# Supplementary material
Source: Springer Nature journal article supplement (https://www.springermedizin.de/resource/supplementary/12885_2013_4468_MOESM2_ESM.pdf/9466462)

Second primary cancer

- Lung (C33-34)
- Colorectal (C18-20)
- Female breast (C50)
- Prostate (C61)
- Bladder (C67)
- Stomach (C16)
- Melanoma (C43)
- Oesophagus (C15)
- Ovary (C56)
- Head and neck (C00-C14, C30-C32)
- Corpus uteri (C54)
- Kidney (C64)
- Pancreas (C25)

Lung (C33-34)

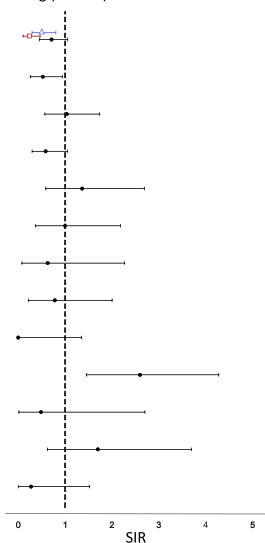

Colorectal (C18-20)

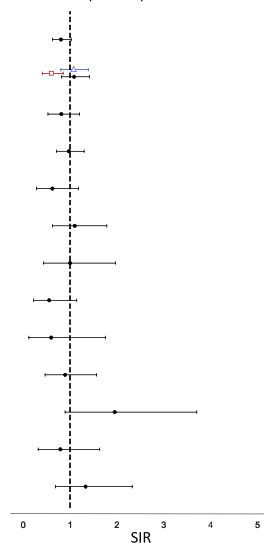

Prostate (C61)

- Lung (C33-34)
- Colorectal (C18-20)
- Female breast (C50)
- Prostate (C61)
- Bladder (C67)
- Stomach (C16)
- Melanoma (C43)
- Oesophagus (C15)
- Ovary (C56)
- Head and neck (C00-C14, C30-C32)
- Corpus uteri (C54)
- Kidney (C64)
- Pancreas (C25)

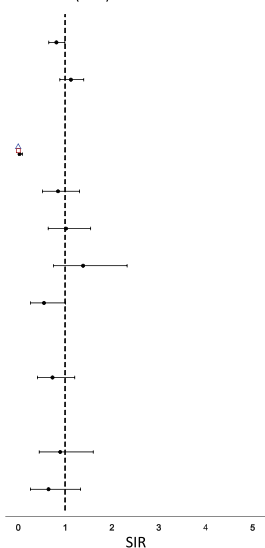

Breast (C50)

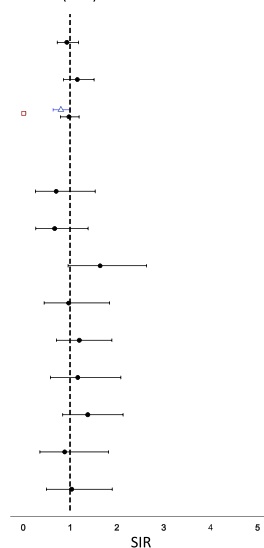

Supplement: MOESM2 [file 9466462]
